# Supplementary material for: Understanding Host-Pathogen Interactions with Expression Profiling of NILs Carrying Rice-Blast Resistance Pi9 Gene
Source: PubMed Central journal article supplement (PMC5322464; doi:10.3389/fpls.2017.00093), 2017-02-23
Supplement: Table1.pdf [file Table1.pdf]

**Supplementary Table 1:** Details of primers used for real time PCR validation.

| <b>Locus ID</b>  | <b>Description</b>                                              | <b>Forward Primer (5'-3')</b> | <b>Reverse Primer (5'-3')</b> |
|------------------|-----------------------------------------------------------------|-------------------------------|-------------------------------|
| LOC_Os02g08440   | WRKY71, expressed                                               | CCCAAGATCTCCAAGCTCTA          | CGCTTCTCTGAACCTTCTTC          |
| LOC_Os09g25060   | WRKY76                                                          | CGATGACCAATGACGAG             | CTCTTCTTGCCCGATAAC            |
| LOC_Os01g60600   | WRKY108                                                         | CCGCGAAAGAGATTATTG            | GGAAGTTGGTGTGTTGTTG           |
| LOC_Os07g48660   | bZIP transcription factor domain containing                     | GAGCTCGAGAACAAGAT             | GGCACAATCTGCATTAC             |
| LOC_Os01g06560   | transcription factor HBP-1b                                     | CTACTACCGGACCAAGT             | CACCAGAGGTAGAGGTT             |
| LOC_Os02g45420   | AP2 domain containing protein, expressed                        | GATTGGCAATGACGATTTTC          | CTAGGGATCACGGTAGC             |
| LOC_Os08g02110   | peroxidase precursor, putative, expressed                       | GAACCAGGCATACTTCTTCTA         | TTGACGACCCTGCAAGATG           |
| LOC_Os07g29410   | thioredoxin, putative, expressed                                | CCACCTTCCTTTCATCAG            | CTTGACGCCGTTGTATCT            |
| LOC_Os01g06836   | disease resistance protein SIVe2 precursor, putative, expressed | TGTCACTTACAAAGGGAACAC         | GACTTTGGAATAGGACCACC          |
| LOC_Os04g43440   | NB-ARC/LRR disease resistance protein                           | GAGAAGGCTGACTCGAACATAAT       | CAACCTGGTAGTTATGGACCTTC       |
| LOC_Os08g28670   | pathogenesis-related Bet v I family protein                     | ACCCTGGGCAAGATCAA             | TCGACCTTCTCAACCTTCT           |
| LOC_Os12g03080   | rp3 protein                                                     | GACCTGGTTCTTGACCTTACTC        | CTCATTGCACGAAGCCAAAG          |
| LOC_Os01g06876   | Cf-2                                                            | ATGAAGCCCACTGTGAACCCCA        | AAGGTAATGTCAACCTATGTG         |
| LOC_Os02g39330   | CHIT1 - Chitinase family protein precursor                      | GCCAACCACGAGACCATAAA          | TCGTCTCGTCGCAGTAGTT           |
| LOC_Os10g02250   | OsWAK95 - OsWAK receptor-like protein kinase                    | TACAATCGCAAATGATGCACAAT       | GGCAAACCTCGTACACTAACA         |
| LOC_Os06g39780   | cytochrome P450, putative, expressed                            | CCAACATCTCCGACTTCTAC          | GAGTCGAGGAAATCGTTATG          |
| Reference Primer | Actin (Reference gene)                                          | GATCTGGCATCACACCTTCTAC        | CTGGGTCATCTTCTCACGATTG        |

**Supplementary Table 2:** Mapping of RNA-Seq Reads Obtained from PB1+*Pi9* and PB1 to *Oryza sativa Nipponbare* (MSU release 7). M: Mock, T: *M. oryzae* infection and BR: Biological replicate

| Rice Lines              | Preprocessed Reads (Left +Right) | Reads Aligned | Muti Aligned Reads | Total Aligned Reads | Aligned Reads (%) | Total Unaligned Reads | Unaligned Reads (%) |
|-------------------------|----------------------------------|---------------|--------------------|---------------------|-------------------|-----------------------|---------------------|
| <b>Resistant Line</b>   |                                  |               |                    |                     |                   |                       |                     |
| PB1+ <i>Pi9</i> M BR1   | 59133337                         | 50875191      | 1983478            | 52858669            | 89.4              | 6274668               | 10.7                |
| PB1+ <i>Pi9</i> M BR2   | 42699125                         | 36497084      | 1679922            | 38177006            | 89.5              | 4522119               | 10.6                |
| PB1+ <i>Pi9</i> M BR3   | 59396424                         | 50940274      | 1854576            | 52794850            | 88.9              | 6601574               | 11.2                |
| PB1+ <i>Pi9</i> T BR1   | 49779566                         | 43462700      | 1141464            | 44604164            | 89.7              | 5175402               | 10.4                |
| PB1+ <i>Pi9</i> T BR2   | 49651750                         | 43462700      | 1041712            | 44504412            | 89.7              | 5147338               | 10.4                |
| PB1+ <i>Pi9</i> T BR3   | 41778784                         | 36575008      | 998656             | 37573664            | 90                | 4205120               | 10.1                |
| <b>Susceptible Line</b> |                                  |               |                    |                     |                   |                       |                     |
| PB1 M BR1               | 45116936                         | 39355055      | 829864             | 40184919            | 89.1              | 4932017               | 11                  |
| PB1 M BR2               | 42090780                         | 36884536      | 771722             | 37656258            | 89.5              | 4434522               | 10.6                |
| PB1 M BR3               | 49089480                         | 42496905      | 958920             | 43455825            | 88.6              | 5633655               | 11.5                |
| PB1 T BR1               | 54721008                         | 48044300      | 949324             | 48993624            | 89.6              | 5727384               | 10.5                |
| PB1 T BR2               | 43477264                         | 38303554      | 739366             | 39042920            | 89.9              | 4434344               | 10.2                |
| PB1 T BR3               | 46390946                         | 40939985      | 770044             | 41710029            | 90                | 4680917               | 10.1                |

**Supplementary Table 3: Pearson correlation coefficient between biological replicate of treated and mock (untreated) sample of PB1+Pi9. M: mock, T: *M. oryzae* infection and BR: Biological replicate**

| <b>Resistant<br/>NIL</b> | <b>PB1+Pi9<br/>M BR1</b> | <b>PB1+Pi9<br/>M BR2</b> | <b>PB1+Pi9 M<br/>BR3</b> | <b>PB1+Pi9 T<br/>BR1</b> | <b>PB1+Pi9 T<br/>BR2</b> | <b>PB1+Pi9 T<br/>BR3</b> |
|--------------------------|--------------------------|--------------------------|--------------------------|--------------------------|--------------------------|--------------------------|
| <b>PB1+Pi9 M<br/>BR1</b> | 1                        | 0.86                     | 0.99                     | 0.61                     | 0.62                     | 0.29                     |
| <b>PB1+Pi9 M<br/>BR2</b> | 0.86                     | 1                        | 0.92                     | 0.92                     | 0.92                     | 0.72                     |
| <b>PB1+Pi9 M<br/>BR3</b> | 0.99                     | 0.92                     | 1                        | 0.7                      | 0.71                     | 0.39                     |
| <b>PB1+Pi9 T<br/>BR1</b> | 0.61                     | 0.92                     | 0.7                      | 1                        | 1                        | 0.92                     |
| <b>PB1+Pi9 T<br/>BR2</b> | 0.62                     | 0.92                     | 0.71                     | 1                        | 1                        | 0.92                     |
| <b>PB1+Pi9 T<br/>BR3</b> | 0.29                     | 0.72                     | 0.39                     | 0.92                     | 0.92                     | 1                        |

**Supplementary Table 4: Pearson correlation coefficient between biological replicate of treated and mock (untreated) sample of PB1. M: mock, T: *M. oryzae* infection and BR: Biological replicate**

| <b>Resistant NIL</b> | <b>PB1 M BR1</b> | <b>PB1 M BR2</b> | <b>PB1 M BR3</b> | <b>PB1 T BR1</b> | <b>PB1 T BR2</b> | <b>PB1 T BR3</b> |
|----------------------|------------------|------------------|------------------|------------------|------------------|------------------|
| <b>PB1 M BR1</b>     | 1                | 1                | 0.89             | 0.86             | 0.87             | 0.82             |
| <b>PB1 M BR2</b>     | 1                | 1                | 0.89             | 0.86             | 0.87             | 0.82             |
| <b>PB1 M BR3</b>     | 0.89             | 0.89             | 1                | 0.72             | 0.75             | 0.77             |
| <b>PB1 T BR1</b>     | 0.86             | 0.86             | 0.72             | 1                | 0.97             | 0.78             |
| <b>PB1 T BR2</b>     | 0.87             | 0.87             | 0.75             | 0.97             | 1                | 0.83             |
| <b>PB1 T BR3</b>     | 0.82             | 0.82             | 0.77             | 0.78             | 0.83             | 1                |

**Supplementary Table 5:** The significant differentially expressed loci (FDR adjusted p-value  $\leq 0.05$  &  $\log_2$ fold change  $\geq 2$ ) involved in respiratory burst unique to PB1+Pi9 NIL upon *M. oryzae* infection. FPKM value of SDEL with *M. oryzae* infection and without infection (mock) along with their fold change in PB1+Pi9 and PB1.

FPKM: Fragment per kilobase of transcript per Million mapped reads; FC:  $\log_2$ fold change.

| <b>Respiratory burst</b>          | <b>PB1+Pi9</b>   |                                    |                          | <b>PB1</b>       |                                    |                  |
|-----------------------------------|------------------|------------------------------------|--------------------------|------------------|------------------------------------|------------------|
| <b>Redox State</b>                | <b>FPKM Mock</b> | <b>FPKM <i>M.oryza</i> Treated</b> | <b>FC in PB1+Pi9 NIL</b> | <b>FPKM Mock</b> | <b>FPKM <i>M.oryza</i> Treated</b> | <b>FC in PB1</b> |
| LOC_Os07g29410                    | 43.5             | 524.3                              | 3.6                      | 299.4            | 692.8                              | 1.2              |
| LOC_Os01g68480                    | 20.8             | 201                                | 3.3                      | 59.7             | 205.9                              | 1.8              |
| LOC_Os06g37080                    | 0.4              | 2.2                                | 2.5                      | 1                | 2.6                                | 1.3              |
| LOC_Os06g39690                    | 3.6              | 20.7                               | 2.5                      | 12.6             | 28.7                               | 1.2              |
| LOC_Os01g13480                    | 3.6              | 15                                 | 2.1                      | 27.2             | 38.7                               | 0.5              |
| LOC_Os06g12190                    | 0.6              | 0.1                                | -2.2                     | 0.2              | 0.2                                | -0.3             |
| <b>Peroxidases</b>                |                  |                                    |                          |                  |                                    |                  |
| LOC_Os03g13210                    | 3.2              | 29.6                               | 3.2                      | 18.9             | 5.4                                | -1.8             |
| LOC_Os04g59160                    | 0.3              | 2.4                                | 3.1                      | 0.2              | 0.3                                | 0.7              |
| LOC_Os04g55740                    | 0.7              | 4.9                                | 2.9                      | 0.8              | 0.2                                | -1.7             |
| LOC_Os04g59200                    | 41.5             | 252.2                              | 2.6                      | 7.6              | 4.1                                | -0.9             |
| LOC_Os03g13180                    | 0.2              | 1.1                                | 2.5                      | 0.1              | 0.2                                | 1.8              |
| LOC_Os01g73200                    | 38.4             | 223                                | 2.5                      | 25.7             | 44.8                               | 0.8              |
| LOC_Os07g48060                    | 48.2             | 9.8                                | -2.3                     | 15.8             | 6.1                                | -1.4             |
| <b>glutathione S transferases</b> |                  |                                    |                          |                  |                                    |                  |
| LOC_Os01g37750                    | 0.6              | 3.9                                | 2.8                      | 1.6              | 4.9                                | 1.7              |
| LOC_Os09g20220                    | 0.2              | 1.1                                | 2.3                      | 0.2              | 1.2                                | 2.8              |

**Supplementary Table 6:** The absolute fold change and standard error of functionally important significant differentially expressed (FDR adjusted p-value  $\leq 0.05$  &  $\log_2$  fold change  $\geq 2$ ) loci (SDEL) validated by real time in resistant (PB1+Pi9) NIL. SE: standard error.

| <b>SDEL</b>    | <b>Description</b>                           | <b>Abbreviation</b> | <b>PB1+Pi9</b> | <b>PB1+Pi9 SE</b> |
|----------------|----------------------------------------------|---------------------|----------------|-------------------|
| LOC_Os02g08440 | WRKY71                                       | WRKY71              | 7              | 2                 |
| LOC_Os09g25060 | WRKY76                                       | WRKY76              | 3              | 0.7               |
| LOC_Os01g60600 | WRKY108                                      | WRKY108             | 6              | 2                 |
| LOC_Os07g48660 | bZIP transcription factor domain             | bZIP                | 6              | 1.5               |
| LOC_Os01g06560 | transcription factor HBP-1b                  | TF HBP-1b           | 1.6            | 0.6               |
| LOC_Os02g45420 | AP2 domain                                   | AP2                 | 7.9            | 0.6               |
| LOC_Os08g02110 | Peroxidase                                   | POX                 | 6.5            | 2                 |
| LOC_Os07g29410 | thioredoxin                                  | TRX                 | 3.9            | 0.69              |
| LOC_Os01g06836 | disease resistance protein SIVe2 precursor   | DR                  | 7              | 2                 |
| LOC_Os04g43440 | NB-ARC/LRR disease resistance protein        | NB/LRR DR           | 6.3            | 1.2               |
| LOC_Os08g28670 | pathogenesis-related Bet v I                 | PR                  | 4.4            | 0.35              |
| LOC_Os12g03080 | rp3 protein                                  | rp3                 | 4.4            | 0.6               |
| LOC_Os01g06876 | Cf-2                                         | Cf-2                | 2.6            | 0.5               |
| LOC_Os02g39330 | CHIT1 - Chitinase                            | CHIT                | 1.22           | 0.24              |
| LOC_Os10g02250 | OsWAK95 - OsWAK receptor-like protein kinase | OsWAK               | 16.2           | 0.2               |
| LOC_Os06g39780 | cytochrome P450                              | CYP450              | 16             | 0.1               |

**Supplementary Table 7:** The significant differentially expressed (FDR adjusted p-value  $\leq 0.05$  &  $\log_2$ fold change  $\geq 2$ ) loci (SDEL) of hormones unique to PB1+Pi9 NIL upon *M. oryzae* infection. FPKM value of SDEL with *M. oryzae* infection and without infection (mock) along with their fold change in PB1+Pi9 and PB1.

FPKM: Fragment per kilobase of transcript per Million mapped reads; FC:  $\log_2$ fold change.

| <b>Hormones</b>       | <b>PB1+Pi9</b>   |                                     |                          | <b>PB1</b>       |                                     |                  |
|-----------------------|------------------|-------------------------------------|--------------------------|------------------|-------------------------------------|------------------|
| <b>Salicylic acid</b> | <b>FPKM Mock</b> | <b>FPKM <i>M.oryzae</i> Treated</b> | <b>FC in PB1+Pi9 NIL</b> | <b>FPKM Mock</b> | <b>FPKM <i>M.oryzae</i> Treated</b> | <b>FC in PB1</b> |
| LOC_Os02g58300        | 0.6              | 2.8                                 | 2.3                      | 1.6              | 3.2                                 | 1.1              |
| LOC_Os06g20790        | 7.7              | 1.5                                 | -2.3                     | 0.7              | 0.4                                 | -0.9             |
| <b>Ethylene</b>       |                  |                                     |                          |                  |                                     |                  |
| LOC_Os08g36920        | 2                | 57.9                                | 4.9                      | 55               | 31.2                                | -0.8             |
| LOC_Os08g30150        | 0.2              | 3.6                                 | 4.6                      | 2.9              | 2.7                                 | -0.1             |
| LOC_Os09g28440        | 1.9              | 18.2                                | 3.2                      | 13.7             | 23.1                                | 0.8              |
| LOC_Os09g35020        | 1.2              | 9.9                                 | 3.1                      | 3.8              | 5.4                                 | 0.5              |
| LOC_Os09g35010        | 29.8             | 200.3                               | 2.7                      | 138              | 161.6                               | 0.2              |
| LOC_Os07g28890        | 0.4              | 2.4                                 | 2.7                      | 0.8              | 0.6                                 | -0.4             |
| LOC_Os09g02710        | 91.3             | 553.5                               | 2.6                      | 531.3            | 726.4                               | 0.5              |
| LOC_Os04g53990        | 2.2              | 12.9                                | 2.5                      | 14               | 6                                   | -1.2             |
| LOC_Os01g39860        | 1.2              | 5.7                                 | 2.3                      | 3.2              | 4.7                                 | 0.5              |
| LOC_Os09g27820        | 14.5             | 61                                  | 2.1                      | 64.5             | 27.1                                | -1.3             |
| LOC_Os05g05680        | 82.4             | 333.7                               | 2                        | 129.5            | 87.4                                | -0.6             |
| LOC_Os03g19270        | 22.7             | 3.4                                 | -2.7                     | 7.1              | 2.9                                 | -1.3             |
| LOC_Os02g43820        | 3.6              | 0.5                                 | -2.9                     | 1.1              | 1                                   | -0.1             |
| <b>Jasmonic Acid</b>  |                  |                                     |                          |                  |                                     |                  |
| LOC_Os06g11210        | 0.9              | 7.5                                 | 3                        | 0.9              | 0.9                                 | -0.1             |
| LOC_Os09g02710        | 91.3             | 553.5                               | 2.6                      | 531.3            | 726.4                               | 0.5              |
| LOC_Os06g11240        | 1.6              | 8.2                                 | 2.4                      | 1.7              | 3.7                                 | 1.2              |
| LOC_Os08g39840        | 67.6             | 335.5                               | 2.3                      | 197.3            | 95.8                                | -1               |
| LOC_Os07g42370        | 58.5             | 257.8                               | 2.1                      | 191.2            | 270.5                               | 0.5              |
| LOC_Os04g37430        | 2.8              | 11.3                                | 2                        | 13.4             | 12.5                                | -0.1             |
| LOC_Os05g28770        | 0.6              | 0.1                                 | -2.1                     | 0.2              | 0.1                                 | -0.8             |
| LOC_Os03g49260        | 4.2              | 0.4                                 | -3.5                     | 0.4              | 0.2                                 | -1.1             |
| LOC_Os02g12680        | 3.7              | 0.2                                 | -4.6                     | 0.8              | 0                                   | -4.5             |

**Supplementary Table 8:** The significant differentially expressed (FDR adjusted p-value  $\leq 0.05$  &  $\log_2$ fold change  $\geq 2$ ) loci (SDEL) of signalling kinases unique to PB1+Pi9 NIL. FPKM value of SDEL with *M. oryzae* infection and without infection (mock) along with their fold change in PB1+Pi9 and PB1.

FPKM : Fragment per kilobase of transcript per million mapped reads . FC:  $\log_2$ Fold change

| Signalling<br>Receptor kinase | PB1+Pi9   |                             |                   | PB1       |                             |           |
|-------------------------------|-----------|-----------------------------|-------------------|-----------|-----------------------------|-----------|
|                               | FPKM Mock | FPKM <i>M.oryza</i> Treated | FC in PB1+Pi9 NIL | FPKM Mock | FPKM <i>M.oryza</i> Treated | FC in PB1 |
| LOC_Os06g13320                | 0         | 0.6                         | 3.5               | 0.3       | 0.5                         | 1         |
| LOC_Os05g02200                | 0.8       | 9.6                         | 3.5               | 6         | 7.9                         | 0.4       |
| LOC_Os10g02250                | 0.5       | 4.6                         | 3.2               | 0.7       | 1.1                         | 0.7       |
| LOC_Os04g45730                | 0.9       | 8.1                         | 3.2               | 6.3       | 6                           | -0.1      |
| LOC_Os11g10260                | 0.1       | 0.6                         | 3                 | 1.3       | 0.6                         | -1.2      |
| LOC_Os07g04820                | 0.2       | 1.4                         | 2.9               | 0.5       | 0.8                         | 0.7       |
| LOC_Os09g38910                | 0.3       | 2.6                         | 2.9               | 1.1       | 3.4                         | 1.7       |
| LOC_Os11g31530                | 0.3       | 1.9                         | 2.8               | 1         | 0.5                         | -1        |
| LOC_Os01g06870                | 0.6       | 3.4                         | 2.4               | 11.3      | 43.2                        | 1.9       |
| LOC_Os02g56370                | 1         | 5.2                         | 2.4               | 1.2       | 2.7                         | 1.2       |
| LOC_Os05g01370                | 0.2       | 0.8                         | 2.2               | 0.4       | 0.3                         | -0.5      |
| LOC_Os11g07160                | 0.9       | 4.2                         | 2.1               | 3.9       | 1.2                         | -1.7      |
| LOC_Os11g07160                | 0.9       | 4.2                         | 2.1               | 3.9       | 1.2                         | -1.7      |
| LOC_Os01g56330                | 3.6       | 14.9                        | 2.1               | 13.4      | 24.8                        | 0.9       |
| LOC_Os11g07160                | 0.9       | 4.2                         | 2.1               | 3.9       | 1.2                         | -1.7      |
| LOC_Os01g59580                | 0.4       | 1.7                         | 2.1               | 0.4       | 0.9                         | 1.3       |
| LOC_Os05g47770                | 1.6       | 7                           | 2.1               | 2.9       | 3.1                         | 0.1       |
| LOC_Os09g38850                | 0.2       | 0.7                         | 2                 | 0.4       | 0.6                         | 0.5       |
| LOC_Os12g03650                | 1.8       | 0.4                         | -2.1              | 0.9       | 0.4                         | -1.2      |
| LOC_Os12g03650                | 1.8       | 0.4                         | -2.1              | 0.9       | 0.4                         | -1.2      |
| LOC_Os10g42190                | 83.6      | 18.4                        | -2.2              | 41.9      | 21.5                        | -1        |
| LOC_Os07g02450                | 4.8       | 1                           | -2.3              | 2.5       | 0.9                         | -1.4      |
| LOC_Os11g28104                | 30.3      | 6.4                         | -2.3              | 5.7       | 4.1                         | -0.5      |
| LOC_Os05g17604                | 13.1      | 1.7                         | -2.9              | 1.9       | 0.8                         | -1.3      |
| LOC_Os02g42780                | 0.7       | 0.1                         | -2.9              | 0         | 0.1                         | 0.5       |
| LOC_Os05g17604                | 13.1      | 1.7                         | -2.9              | 1.9       | 0.8                         | -1.3      |
| LOC_Os08g04240                | 0.6       | 0.1                         | -3.2              | 0.2       | 0.1                         | -0.2      |
| LOC_Os11g07270                | 0.6       | 0                           | -3.8              | 1.3       | 0.5                         | -1.4      |
| LOC_Os04g56430                | 914.6     | 12.8                        | -6.2              | 2.4       | 1.6                         | -0.6      |
| <b>Calcium sensor protein</b> |           |                             |                   |           |                             |           |
| LOC_Os01g72100                | 22.2      | 187                         | 3.1               | 121.2     | 92.6                        | -0.4      |
| LOC_Os01g72530                | 32.4      | 287.2                       | 3.1               | 152.2     | 358.3                       | 1.2       |
| LOC_Os07g48340                | 5.9       | 39.1                        | 2.7               | 29.8      | 86.8                        | 1.5       |
| LOC_Os06g46950                | 178.1     | 793                         | 2.2               | 367.5     | 541.3                       | 0.6       |



|                    |      |      |     |       |       |      |
|--------------------|------|------|-----|-------|-------|------|
| LOC_Os12g05420     | 11   | 46.6 | 2.1 | 27.5  | 20.4  | -0.4 |
| LOC_Os03g21380     | 21.8 | 93.1 | 2.1 | 73.4  | 190.2 | 1.4  |
| LOC_Os12g41110     | 1.7  | 7.2  | 2.1 | 2.5   | 2.4   | 0    |
| LOC_Os03g20370     | 82.1 | 355  | 2.1 | 276.5 | 428.4 | 0.6  |
| <b>G-proteins</b>  |      |      |     |       |       |      |
| LOC_Os01g37460     | 0.4  | 1.9  | 2.3 | 0.6   | 0.1   | -2.1 |
| LOC_Os11g01610     | 0.4  | 1.6  | 2   | 0.6   | 1.6   | 1.4  |
| LOC_Os01g62950     | 1.6  | 6.6  | 2   | 10.6  | 26.6  | 1.3  |
| <b>MAP kinases</b> |      |      |     |       |       |      |
| LOC_Os05g49140     | 3.7  | 19.5 | 2.4 | 37.8  | 77.7  | 1    |

**Supplementary Table 9:** The significant differentially expressed (FDR adjusted p-value  $\leq 0.05$  &  $\log_2$ fold change  $\geq 2$ ) loci (SDEL) of transcription factor unique to PB1+Pi9 NIL. FPKM value of SDEL with *M. oryzae* infection and without infection (mock) along with their fold change in PB1+Pi9 and PB1.

FPKM: Fragment per kilobase of transcript per Million mapped reads; FC:  $\log_2$ fold change.

| Transcription Factor                    | PB1+Pi9   |                              |                   | PB1       |                              |           |
|-----------------------------------------|-----------|------------------------------|-------------------|-----------|------------------------------|-----------|
|                                         | FPKM Mock | FPKM <i>M.oryzae</i> Treated | FC in PB1+Pi9 NIL | FPKM Mock | FPKM <i>M.oryzae</i> Treated | FC in PB1 |
| AP2/EREBP & Ethylene-responsive element |           |                              |                   |           |                              |           |
| LOC_Os02g45450                          | 0.6       | 43                           | 6.1               | 34.9      | 25.1                         | -0.5      |
| LOC_Os06g03670                          | 0.1       | 3.2                          | 4.8               | 4.6       | 16.9                         | 1.9       |
| LOC_Os04g48350                          | 1         | 20.8                         | 4.3               | 12.3      | 10.8                         | -0.2      |
| LOC_Os02g45420                          | 0.1       | 0.9                          | 4.1               | 1         | 2.3                          | 1.2       |
| LOC_Os09g35020                          | 1.2       | 9.9                          | 3.1               | 3.8       | 5.4                          | 0.5       |
| LOC_Os09g35010                          | 29.8      | 200.3                        | 2.7               | 138       | 161.6                        | 0.2       |
| LOC_Os09g35030                          | 12.5      | 63.4                         | 2.3               | 45.6      | 32.8                         | -0.5      |
| LOC_Os01g12440                          | 0.1       | 0.5                          | 2.2               | 0.2       | 0.6                          | 1.5       |
| LOC_Os01g21120                          | 3.9       | 16                           | 2                 | 12        | 20.3                         | 0.8       |
| <b>bZIP</b>                             |           |                              |                   |           |                              |           |
| LOC_Os06g45140                          | 21.3      | 4.1                          | -2.4              | 14.1      | 7.5                          | -0.9      |
| <b>WRKY</b>                             |           |                              |                   |           |                              |           |
| LOC_Os02g26430                          | 0.4       | 6                            | 3.7               | 3.9       | 5.7                          | 0.5       |
| LOC_Os01g60600                          | 0.2       | 2.4                          | 3.6               | 2.5       | 3                            | 0.2       |
| LOC_Os02g08440                          | 69.1      | 406.8                        | 2.6               | 357.2     | 327.4                        | -0.1      |
| LOC_Os01g51690                          | 0.2       | 1.2                          | 2.5               | 0.6       | 0.1                          | -2.6      |
| LOC_Os06g44010                          | 12.2      | 69.6                         | 2.5               | 55.9      | 20.8                         | -1.4      |
| LOC_Os09g25060                          | 2.4       | 11.3                         | 2.3               | 3.3       | 4.5                          | 0.4       |
| LOC_Os07g48260                          | 4.4       | 17.9                         | 2                 | 3.1       | 6.2                          | 1         |
| <b>MYB</b>                              |           |                              |                   |           |                              |           |
| LOC_Os09g23620                          | 1.1       | 8.9                          | 3.1               | 1.3       | 2.5                          | 0.9       |
| LOC_Os08g33150                          | 0.2       | 1.9                          | 3.1               | 0.4       | 1.4                          | 1.7       |
| LOC_Os01g19330                          | 2.2       | 14.7                         | 2.8               | 14.3      | 5.3                          | -1.4      |
| LOC_Os04g43680                          | 14.4      | 90.3                         | 2.7               | 45        | 74.5                         | 0.7       |
| LOC_Os06g43090                          | 9         | 53.9                         | 2.6               | 35.7      | 36                           | 0         |
| LOC_Os09g01960                          | 4.1       | 20.6                         | 2.3               | 21.9      | 16.9                         | -0.4      |
| LOC_Os02g41510                          | 14.5      | 71.3                         | 2.3               | 21.9      | 24.1                         | 0.1       |
| LOC_Os12g38400                          | 0.2       | 0.9                          | 2.1               | 0.2       | 0.3                          | 0.8       |
| LOC_Os02g42850                          | 1.4       | 5.9                          | 2.1               | 3.5       | 7.3                          | 1         |
| LOC_Os02g40530                          | 2         | 8.3                          | 2                 | 12.3      | 5.4                          | -1.2      |
| LOC_Os03g32090                          | 5.5       | 1.4                          | -2                | 2.2       | 2.4                          | 0.1       |
| LOC_Os02g07050                          | 1.7       | 0.4                          | -2.2              | 0.3       | 0.5                          | 0.7       |
| LOC_Os12g03150                          | 1         | 0.2                          | -2.7              | 0.3       | 0.2                          | -0.9      |

**Supplementary Table 10:** The significant differentially expressed (FDR adjusted p-value  $\leq 0.05$  &  $\log_2$ fold change  $\geq 2$ ) loci (SDEL) involved in lipid metabolism unique to PB1+Pi9 NIL. FPKM value of SDEL with *M. oryzae* infection and without infection (mock) along with their fold change in both PB1+Pi9 and PB1.

FPKM: Fragment per kilobase of transcript per Million mapped reads; FC:  $\log_2$ fold change.

| <b>Lipid metabolism</b>                  | <b>PB1+Pi9</b>   |                                    |                          | <b>PB1</b>       |                                    |                  |
|------------------------------------------|------------------|------------------------------------|--------------------------|------------------|------------------------------------|------------------|
| <b>Phospholipid synthesis</b>            | <b>FPKM Mock</b> | <b>FPKM <i>M.oryza</i> Treated</b> | <b>FC in PB1+Pi9 NIL</b> | <b>FPKM Mock</b> | <b>FPKM <i>M.oryza</i> Treated</b> | <b>FC in PB1</b> |
| LOC_Os01g50030                           | 5.5              | 40                                 | 2.9                      | 5.5              | 40                                 | 2.9              |
| LOC_Os01g50032                           | 5.5              | 5.5                                | 2.9                      | 5.5              | 40                                 | 2.9              |
| LOC_Os05g47540                           | 12.7             | 12.7                               | 2.9                      | 12.7             | 97.9                               | 2.9              |
| LOC_Os05g47545                           | 12.7             | 12.7                               | 2.9                      | 12.7             | 97.9                               | 2.9              |
| LOC_Os04g54200                           | 19.3             | 19.3                               | 2.2                      | 19.3             | 87.5                               | 2.2              |
| LOC_Os10g17990                           | 2.9              | 2.9                                | 2                        | 2.9              | 12.1                               | 2                |
| <b>Sphingolipids</b>                     |                  |                                    |                          |                  |                                    |                  |
| LOC_Os02g37800                           | 0.1              | 0.1                                | 3.4                      | 0.1              | 1.5                                | 3.4              |
| LOC_Os03g13030                           | 1.1              | 1.1                                | 3.2                      | 1.1              | 10.5                               | 3.2              |
| LOC_Os08g20130                           | 0.1              | 0.1                                | 2.9                      | 0.1              | 0.5                                | 2.9              |
| LOC_Os02g42660                           | 0.1              | 0.1                                | 2                        | 0.1              | 0.5                                | 2                |
| LOC_Os09g33820                           | 84.5             | 84.5                               | -2.2                     | 84.5             | 18.6                               | -2.2             |
| <b>FA desaturation</b>                   |                  |                                    |                          |                  |                                    |                  |
| LOC_Os03g18070                           | 5.3              | 5.3                                | 3.7                      | 5.3              | 67.6                               | 3.7              |
| LOC_Os07g23430                           | 0.6              | 0.6                                | 2.4                      | 0.6              | 3.2                                | 2.4              |
| <b>FA synthesis &amp; elongation</b>     |                  |                                    |                          |                  |                                    |                  |
| LOC_Os02g11070                           | 12.3             | 12.3                               | 3.1                      | 12.3             | 107                                | 3.1              |
| LOC_Os08g10010                           | 0.1              | 0.1                                | 2.6                      | 0.1              | 0.5                                | 2.6              |
| LOC_Os02g56860                           | 1.3              | 1.3                                | 2.2                      | 1.3              | 5.8                                | 2.2              |
| LOC_Os07g42420                           | 1.2              | 1.2                                | 2                        | 1.2              | 4.8                                | 2                |
| LOC_Os09g38350                           | 2.3              | 2.3                                | -2.8                     | 2.3              | 0.3                                | -2.8             |
| <b>Lipid degradation: lipases</b>        |                  |                                    |                          |                  |                                    |                  |
| LOC_Os08g04800                           | 0.1              | 0.1                                | 3.4                      | 0.1              | 0.8                                | 3.4              |
| LOC_Os04g56240                           | 11.6             | 11.6                               | 2.8                      | 11.6             | 79.2                               | 2.8              |
| LOC_Os07g34420                           | 0.7              | 0.7                                | 2.1                      | 0.7              | 2.8                                | 2.1              |
| LOC_Os03g61540                           | 71.2             | 71.2                               | -2.1                     | 71.2             | 16.5                               | -2.1             |
| <b>Lipid degradation: phospholipases</b> |                  |                                    |                          |                  |                                    |                  |
| LOC_Os06g40170                           | 0.2              | 0.2                                | 3.4                      | 0.2              | 1.8                                | 3.4              |
| LOC_Os05g07880                           | 0.3              | 0.3                                | 2.1                      | 0.3              | 1.2                                | 2.1              |

**Supplementary Table 11:** The significant differentially expressed (FDR adjusted p-value  $\leq 0.05$  &  $\log_2$ fold change  $\geq 2$ ) loci (SDEL) involved in protein degradation unique to PB1+Pi9 NIL. FPKM value of SDEL with *M. oryzae* infection and without infection (mock) along with their fold change in PB1+Pi9 and PB1.

FPKM: Fragment per kilobase of transcript per Million mapped reads; FC:  $\log_2$ fold change.

| Locus ID for Protein degradation | PB1+Pi9   |                              |                   | PB1       |                              |           |
|----------------------------------|-----------|------------------------------|-------------------|-----------|------------------------------|-----------|
|                                  | FPKM Mock | FPKM <i>M.oryzae</i> Treated | FC in PB1+Pi9 NIL | FPKM Mock | FPKM <i>M.oryzae</i> Treated | FC in PB1 |
| LOC_Os01g66130                   | 4.3       | 18.6                         | 2.1               | 3.1       | 8.2                          | 1.4       |
| LOC_Os12g28590                   | 4.3       | 18.6                         | 2.1               | 3.1       | 8.2                          | 1.4       |
| LOC_Os09g12310                   | 20        | 99.1                         | 2.3               | 51.4      | 76.1                         | 0.6       |
| LOC_Os02g52210                   | 643.5     | 159.1                        | -2                | 296.2     | 104.2                        | -1.5      |
| LOC_Os09g39190                   | 0.4       | 2                            | 2.3               | 0.8       | 1.5                          | 0.9       |
| LOC_Os02g55550                   | 0.2       | 0.9                          | 2.1               | 0.4       | 0.9                          | 1.2       |
| LOC_Os05g39930                   | 0.5       | 5.6                          | 3.4               | 6         | 3.1                          | -1        |
| LOC_Os01g47050                   | 0.5       | 2.5                          | 2.3               | 2.3       | 8.7                          | 1.9       |
| LOC_Os02g46100                   | 3.5       | 47                           | 3.7               | 0         | 0                            | 0         |
| LOC_Os01g48930                   | 3.5       | 47                           | 3.7               | 14.5      | 12.7                         | -0.2      |
| LOC_Os02g35347                   | 8.4       | 1.3                          | -2.7              | 3         | 2.3                          | -0.4      |
| LOC_Os06g49750                   | 3.2       | 67.6                         | 4.4               | 75.5      | 82.1                         | 0.1       |
| LOC_Os06g12560                   | 3.1       | 15.7                         | 2.4               | 8.3       | 28.3                         | 1.8       |
| LOC_Os02g51350                   | 15.6      | 109.6                        | 2.8               | 114.1     | 203.1                        | 0.8       |
| LOC_Os09g39500                   | 8.5       | 1.5                          | -2.5              | 5.1       | 3.5                          | -0.5      |
| LOC_Os12g28710                   | 0.2       | 1                            | 2.3               | 0.5       | 1.5                          | 1.4       |
| LOC_Os02g35329                   | 0.5       | 2.7                          | 2.4               | 1.6       | 4.9                          | 1.6       |

**Supplementary Table 12:** The significant differentially expressed (FDR adjusted p-value  $\leq 0.05$  &  $\log_2$ fold change  $\geq 2$ ) loci (SDEL) of secondary metabolites unique to PB1+Pi9 NIL. FPKM value of SDEL with *M. oryzae* infection and without infection (mock) along with their fold change PB1+Pi9 and PB1.

FPKM: Fragment per kilobase of transcript per Million mapped reads; FC:  $\log_2$ fold change.

| Secondary Metabolism    | PB1+Pi9   |                              |                   | PB1       |                              |           |
|-------------------------|-----------|------------------------------|-------------------|-----------|------------------------------|-----------|
|                         | FPKM Mock | FPKM <i>M.oryzae</i> Treated | FC in PB1+Pi9 NIL | FPKM Mock | FPKM <i>M.oryzae</i> Treated | FC in PB1 |
| LOC_Os04g27790          | 6.6       | 61                           | 3.2               | 35.4      | 117.1                        | 1.7       |
| LOC_Os08g09370          | 0.7       | 5.7                          | 3                 | 3.9       | 8.4                          | 1.1       |
| LOC_Os02g36210          | 0.1       | 0.9                          | 2.7               | 0.2       | 0.6                          | 1.4       |
| LOC_Os04g56230          | 0.1       | 0.6                          | 2.2               | 0.4       | 0.3                          | -0.3      |
| LOC_Os03g02710          | 2.7       | 12.7                         | 2.2               | 12.6      | 23.3                         | 0.9       |
| LOC_Os04g48880          | 1.9       | 8.1                          | 2.1               | 6.2       | 10.7                         | 0.8       |
| LOC_Os03g03370          | 28.1      | 4.8                          | -2.6              | 2.9       | 1.9                          | -0.6      |
| LOC_Os02g36140          | 14.6      | 2.2                          | -2.7              | 2.4       | 1.1                          | -1.2      |
| LOC_Os02g36020          | 1.9       | 0.1                          | -4.1              | 0.2       | 0                            | -2.7      |
| <b>Flavonoid</b>        |           |                              |                   |           |                              |           |
| LOC_Os03g08630          | 0         | 1                            | 4.5               | 0.1       | 0.5                          | 3         |
| LOC_Os04g53810          | 0.8       | 4.4                          | 2.6               | 15        | 15.7                         | 0.1       |
| LOC_Os01g01660          | 367.7     | 53.5                         | -2.8              | 18.6      | 13.4                         | -0.5      |
| LOC_Os03g08630          | 367.7     | 53.5                         | -2.8              | 18.6      | 13.4                         | -0.5      |
| <b>Phenylpropanoids</b> |           |                              |                   |           |                              |           |
| LOC_Os04g56900          | 2.9       | 52                           | 4.2               | 6.4       | 12.4                         | 1         |
| LOC_Os11g48110          | 14.1      | 115                          | 3                 | 0         | 0                            | 0         |
| LOC_Os08g14570          | 8.9       | 65.5                         | 2.9               | 37.1      | 102.4                        | 1.5       |
| LOC_Os02g08100          | 0.2       | 1.7                          | 2.8               | 0.2       | 0.6                          | 1.7       |
| LOC_Os08g38910          | 13.2      | 76.3                         | 2.5               | 49.7      | 47.7                         | -0.1      |
| LOC_Os08g34790          | 2         | 10.7                         | 2.4               | 0.5       | 0.7                          | 0.4       |
| LOC_Os09g23530          | 4.4       | 22.9                         | 2.4               | 5.8       | 11.6                         | 1         |
| LOC_Os08g01950          | 4.8       | 22.9                         | 2.3               | 9.5       | 6.5                          | -0.5      |
| LOC_Os05g19910          | 0.1       | 0.5                          | 2.3               | 0         | 0                            | 0         |
| LOC_Os12g25820          | 29.8      | 145.1                        | 2.3               | 97.8      | 107.2                        | 0.1       |
| LOC_Os11g42370          | 2         | 9.6                          | 2.3               | 0.5       | 0.6                          | 0.3       |
| LOC_Os12g33610          | 2.6       | 11.5                         | 2.1               | 2.9       | 5.2                          | 0.9       |
| LOC_Os08g38900          | 114.5     | 491.1                        | 2.1               | 201.6     | 168                          | -0.3      |
| LOC_Os10g23820          | 0.6       | 0.1                          | -2.7              | 0.1       | 0.1                          | -0.4      |
| LOC_Os08g38920          | 1.3       | 0.2                          | -2.8              | 0         | 0                            | inf       |
| LOC_Os02g09490          | 3.8       | 0.4                          | -3.1              | 0.1       | 0                            | -2.1      |
| LOC_Os06g39470          | 3.6       | 0.2                          | -3.9              | 0         | 0                            | -1.8      |
| <b>Simple phenols</b>   |           |                              |                   |           |                              |           |

|                |      |     |      |     |     |     |
|----------------|------|-----|------|-----|-----|-----|
| LOC_Os09g32952 | 0    | 0.7 | 4    | 0   | 0.2 | inf |
| LOC_Os01g63180 | 0.2  | 1.3 | 2.6  | 0.3 | 1   | 1.8 |
| LOC_Os06g37080 | 0.4  | 2.2 | 2.5  | 1   | 2.6 | 1.3 |
| LOC_Os09g20090 | 0.2  | 1   | 2.1  | 0.1 | 0.5 | 1.8 |
| LOC_Os12g15680 | 21.3 | 1.1 | -4.3 | 0.2 | 0.9 | 1.8 |
| <b>Wax</b>     |      |     |      |     |     |     |
| LOC_Os06g44300 | 0.2  | 2.2 | 3.7  | 0.1 | 0.1 | 0   |
| LOC_Os02g40784 | 1.1  | 5.5 | 2.4  | 6.3 | 7.8 | 0.3 |

**Supplementary Table 13:** Singular enrichment analysis to find number of significant differentially expressed loci (SDEL) unique to PB1 present in different gene ontology (GO) terms obtained by Singular Enrichment Analysis (SEA).

P stands for biological processes and F stands for molecular function.

| <b>GO accession</b> | <b>Term type</b> | <b>GO Term</b>                  | <b>Number of SDEL in PB1</b> | <b>Corrected pvalue</b> |
|---------------------|------------------|---------------------------------|------------------------------|-------------------------|
| GO:0050896          | P                | response to stimulus            | 123                          | 0.00064                 |
| GO:0009719          | P                | response to endogenous stimulus | 44                           | 0.012                   |
| GO:0019748          | P                | secondary metabolic process     | 19                           | 0.012                   |
| GO:0019825          | F                | oxygen binding                  | 18                           | 0.00016                 |
| GO:0003824          | F                | catalytic activity              | 197                          | 0.018                   |

**Supplementary Table 14:** The significant differentially expressed loci (FDR adjusted p-value  $\leq 0.05$  &  $\log_2$  fold change  $\geq 2$ ) unique to PB1+Pi9 present in the gene ontology term, response to biotic stimulus (GO:0009607), their encoded protein and respective  $\log_2$ fold change in both PB1+Pi9 and PB1.

FPKM : Fragment per kilobase of transcript per Million mapped reads , FC :  $\log_2$ fold change.

| SDEL involved in biotic stimulus | Protein   | PB1+Pi9   |                      |     | PB1       |                      |      |
|----------------------------------|-----------|-----------|----------------------|-----|-----------|----------------------|------|
|                                  |           | FPKM Mock | FPKM M.oryza Treated | FC  | FPKM Mock | FPKM M.oryza Treated | FC   |
| LOC_Os08g36920                   | OsJ_27650 | 2         | 57.9                 | 4.9 | 55        | 31.3                 | -0.9 |
| LOC_Os03g50960                   | 4333923   | 1.6       | 40.2                 | 4.8 | 60.9      | 113.1                | 0.9  |
| LOC_Os03g08330                   | 4331834   | 9.7       | 160.4                | 4.1 | 157.7     | 148.2                | -0.1 |
| LOC_Os02g45420                   | OsJ_07913 | 0.1       | 1                    | 4.1 | 1         | 2.4                  | 1.3  |
| LOC_Os02g26430                   | 4329309   | 0.5       | 6                    | 3.8 | 4         | 5.7                  | 0.6  |
| LOC_Os09g26780                   | 4347164   | 2.1       | 26.7                 | 3.7 | 36.4      | 72.4                 | 1    |
| LOC_Os04g48330                   | OsJ_15841 | 0.3       | 3.2                  | 3.7 | 2.7       | 2.2                  | -0.4 |
| LOC_Os08g28670                   | 4345410   | 0.6       | 5.6                  | 3.5 | 0.5       | 0.8                  | 0.8  |
| LOC_Os01g51570                   | 4325938   | 46.5      | 511.1                | 3.5 | 222.1     | 233.3                | 0.1  |
| LOC_Os09g28440                   | 4347266   | 2         | 18.3                 | 3.3 | 13.8      | 23.2                 | 0.8  |
| LOC_Os01g64470                   | 4324791   | 18.9      | 169.9                | 3.2 | 74.4      | 159.9                | 1.2  |
| LOC_Os09g38910                   | 4347859   | 0.4       | 2.6                  | 2.9 | 1.1       | 3.5                  | 1.7  |
| LOC_Os01g71340                   | ~         | 136.6     | 1018.3               | 2.9 | 185.7     | 180.3                | -0.1 |
| LOC_Os02g47470                   | 4330448   | 21.2      | 148.4                | 2.9 | 75.1      | 189.5                | 1.4  |
| LOC_Os04g43440                   | OsJ_15452 | 4.8       | 30.7                 | 2.8 | 34.9      | 21.9                 | -0.7 |
| LOC_Os08g06280                   | 4344713   | 6.1       | 37.1                 | 2.7 | 9.9       | 22.6                 | 1.2  |
| LOC_Os02g08440                   | 4328512   | 69.2      | 406.8                | 2.6 | 357.3     | 327.5                | -0.2 |
| LOC_Os06g44010                   | 4341678   | 12.3      | 69.7                 | 2.6 | 56        | 20.8                 | -1.5 |
| LOC_Os01g51690                   | 4325945   | 0.3       | 1.3                  | 2.6 | 0.6       | 0.1                  | -2.6 |
| LOC_Os07g46670                   | 4344182   | 65.3      | 378.8                | 2.6 | 328.4     | 346.1                | 0.1  |
| LOC_Os10g39680                   | 4349267   | 19.2      | 114                  | 2.6 | 53.9      | 65.6                 | 0.3  |
| LOC_Os02g08100                   | 4328485   | 13.3      | 76.3                 | 2.6 | 49.8      | 47.8                 | -0.1 |
| LOC_Os02g36440                   | 4329742   | 15.2      | 80.8                 | 2.5 | 35.2      | 58.3                 | 0.8  |
| LOC_Os02g40784                   | 4330012   | 1.1       | 5.5                  | 2.4 | 6.4       | 7.8                  | 0.3  |
| LOC_Os08g35600                   | 4345755   | 1.2       | 5.6                  | 2.4 | 2.1       | 3.3                  | 0.7  |
| LOC_Os07g19000                   | 4342947   | 3.3       | 16.3                 | 2.4 | 18.7      | 16.4                 | -0.2 |
| LOC_Os07g18990                   | 4342946   | 19        | 95.6                 | 2.4 | 76.7      | 66.4                 | -0.3 |
| LOC_Os08g39840                   | 4345993   | 67.7      | 335.6                | 2.4 | 197.4     | 95.8                 | -1.1 |
| LOC_Os06g43304                   | 4341623   | 0.2       | 0.6                  | 2.4 | 0         | 0                    | 0    |
| LOC_Os04g58810                   | 4337457   | 19.8      | 98.2                 | 2.4 | 63.2      | 75.6                 | 0.3  |
| LOC_Os08g34790                   | 4345717   | 4.4       | 22.9                 | 2.4 | 5.9       | 11.7                 | 1    |
| LOC_Os04g32480                   | 4335698   | 0.6       | 2.5                  | 2.3 | 3.5       | 7.2                  | 1.1  |
| LOC_Os09g25060                   | 4347069   | 2.4       | 11.3                 | 2.3 | 3.3       | 4.5                  | 0.5  |
| LOC_Os02g03280                   | 4328149   | 55.8      | 269.6                | 2.3 | 328       | 191.3                | -0.8 |



|                |           |      |      |     |      |      |      |
|----------------|-----------|------|------|-----|------|------|------|
| LOC_Os01g71690 | OsJ_04732 | 2.2  | 10.2 | 2.3 | 5.8  | 9.6  | 0.8  |
| LOC_Os09g23530 | 4346988   | 2    | 9.7  | 2.3 | 0.6  | 0.7  | 0.3  |
| LOC_Os02g21009 | 4329139   | 0.6  | 2.6  | 2.2 | 3.3  | 7.6  | 1.3  |
| LOC_Os01g42780 | 4325325   | 2.1  | 9.1  | 2.2 | 3.3  | 1.1  | -1.6 |
| LOC_Os01g56330 | 4325600   | 3.6  | 15   | 2.1 | 13.4 | 24.8 | 0.9  |
| LOC_Os03g57310 | 4334356   | 21.4 | 90.4 | 2.1 | 29.4 | 41.9 | 0.6  |
| LOC_Os03g08170 | 4331822   | 1    | 4.2  | 2.1 | 0.8  | 2.7  | 1.9  |
| LOC_Os12g38400 | 4352588   | 0.3  | 0.9  | 2.1 | 0.2  | 0.4  | 0.8  |
| LOC_Os04g37430 | OsJ_14956 | 2.9  | 11.3 | 2.1 | 13.4 | 12.6 | -0.1 |
| LOC_Os04g46970 | 4336628   | 3.3  | 13.4 | 2.1 | 4.1  | 9.6  | 1.3  |
| LOC_Os09g27820 | 4347225   | 14.6 | 61   | 2.1 | 64.6 | 27.2 | -1.3 |

**Supplementary Table 15:** Details of node and scores of proteins corresponding to significant differentially expressed loci (SDEL; FDR adjusted p-value  $\leq 0.05$  &  $\log_2$  fold change  $\geq 2$ ) unique to PB1+Pi9 in response to biotic stimulus present in co-expression network .

| node1     | node2     | neighborhood | homology | coexpression | experimental | knowledge | textmining | combined score |
|-----------|-----------|--------------|----------|--------------|--------------|-----------|------------|----------------|
| 4337457   | 4331834   | 0            | 0        | 0.758        | 0            | 0         | 0          | 0.8            |
| 4345717   | 4324791   | 0            | 0        | 0.46         | 0            | 0         | 0          | 0.5            |
| 4344713   | 4328149   | 0            | 0        | 0            | 0            | 0         | 0.534      | 0.5            |
| 4345755   | OsJ_15452 | 0            | 0        | 0.418        | 0.07         | 0         | 0.075      | 0.5            |
| 4334356   | 4324791   | 0            | 0        | 0.537        | 0            | 0         | 0          | 0.5            |
| 4341623   | 4328485   | 0.08         | 0        | 0            | 0            | 0.344     | 0.107      | 0.4            |
| 4345717   | OsJ_15452 | 0            | 0        | 0.423        | 0            | 0         | 0          | 0.4            |
| 4341678   | 4331834   | 0            | 0        | 0.794        | 0            | 0         | 0          | 0.8            |
| OsJ_15452 | 4324791   | 0            | 0        | 0.847        | 0            | 0         | 0          | 0.8            |
| 4335698   | 4331834   | 0            | 0.731    | 0.592        | 0            | 0         | 0          | 0.6            |
| 4330448   | 4328485   | 0.08         | 0        | 0            | 0            | 0.344     | 0.107      | 0.4            |
| 4341678   | 4337457   | 0            | 0        | 0.834        | 0            | 0         | 0          | 0.8            |
| 4337457   | 4330448   | 0            | 0        | 0.531        | 0            | 0         | 0          | 0.5            |
| 4347164   | 4331834   | 0            | 0.749    | 0.56         | 0            | 0         | 0.555      | 0.6            |
| 4347266   | OsJ_27650 | 0            | 0.915    | 0.49         | 0            | 0         | 0          | 0.5            |
| 4344182   | 4331834   | 0            | 0        | 0.526        | 0            | 0         | 0          | 0.5            |
| 4345717   | 4341678   | 0            | 0        | 0.852        | 0            | 0         | 0          | 0.9            |
| 4345717   | 4328512   | 0            | 0        | 0.688        | 0            | 0         | 0          | 0.7            |
| OsJ_27650 | 4331834   | 0            | 0        | 0.853        | 0            | 0         | 0          | 0.9            |
| 4331834   | 4328512   | 0            | 0        | 0.919        | 0            | 0         | 0          | 0.9            |
| 4345755   | 4345717   | 0            | 0        | 0.403        | 0            | 0         | 0          | 0.4            |
| 4345717   | 4341623   | 0.08         | 0        | 0            | 0            | 0.344     | 0.107      | 0.4            |
| OsJ_27650 | 4328512   | 0            | 0        | 0.515        | 0            | 0         | 0.081      | 0.5            |
| 4347069   | 4341678   | 0            | 0.8      | 0.163        | 0.94         | 0         | 0.863      | 1              |
| 4341678   | OsJ_15452 | 0            | 0        | 0.571        | 0            | 0         | 0          | 0.6            |
| 4345717   | 4330448   | 0.08         | 0        | 0.115        | 0            | 0.344     | 0.107      | 0.5            |
| 4337457   | 4334356   | 0            | 0        | 0.414        | 0            | 0         | 0          | 0.4            |
| 4341678   | 4335698   | 0            | 0        | 0.535        | 0            | 0         | 0          | 0.5            |
| 4330448   | 4328512   | 0            | 0        | 0.596        | 0            | 0         | 0          | 0.6            |
| 4337457   | 4328512   | 0            | 0        | 0.831        | 0            | 0         | 0          | 0.8            |
| 4329309   | 4324791   | 0            | 0        | 0.463        | 0            | 0         | 0          | 0.5            |
| 4341678   | 4328512   | 0            | 0.951    | 0.805        | 0            | 0         | 0.079      | 0.8            |
| 4334356   | 4328512   | 0            | 0        | 0.427        | 0            | 0         | 0          | 0.4            |
| 4328512   | 4324791   | 0            | 0        | 0.558        | 0            | 0         | 0          | 0.6            |
| 4347069   | 4328512   | 0            | 0.816    | 0.277        | 0.952        | 0         | 0.878      | 1              |

**Supplementary Table 16:** The expression value of each SDEL in PB1+Pi9 validated by qRT-PCR. The expression was measured in terms of Cp which is inversely proportional to the expression of gene. Delta Cp =Cp value of target gene - Cp value of reference gene.

| SDEL validated Using<br>Real Time PCR | PB1+Pi9          |                     |                   |
|---------------------------------------|------------------|---------------------|-------------------|
|                                       | delta Cp<br>Mock | delta Cp<br>Treated | delta delta<br>Cp |
| LOC_Os02g08440                        | -0.4             | -3.2                | -2.8              |
| LOC_Os09g25060                        | 1.9              | 0.3                 | -1.6              |
| LOC_Os01g60600                        | 12               | 9.7                 | -2.3              |
| LOC_Os07g48660                        | 11.3             | 8.7                 | -2.6              |
| LOC_Os01g06560                        | 8.7              | 8.2                 | -0.5              |
| LOC_Os02g45420                        | 8.3              | 5.3                 | -3                |
| LOC_Os08g02110                        | 3                | 0.3                 | -2.7              |
| LOC_Os07g29410                        | -4.4             | -6.3                | -2                |
| LOC_Os01g06836                        | 9.4              | 6.6                 | -2.8              |
| LOC_Os04g43440                        | 2.4              | -0.2                | -2.6              |
| LOC_Os08g28670                        | 2                | -0.1                | -2.1              |
| LOC_Os12g03080                        | 4.1              | 2                   | -2.1              |
| LOC_Os01g06876                        | -0.7             | -2                  | -1.3              |
| LOC_Os02g39330                        | -1.2             | -1.3                | -0.2              |
| LOC_Os10g02250                        | 9.5              | 5.5                 | -4                |
| LOC_Os06g39780                        | 5.6              | 1.6                 | -4                |
